# Supplementary material for: Association of Genetic Variants of RANK, RANKL, and OPG with Ankylosing Spondylitis Clinical Features in Taiwanese
Source: Hindawi journal article supplement (doi:10.1155/2019/8029863), 2019-03-20

**Association of genetic variants of *RANK*, *RANKL*, and *OPG* with ankylosing spondylitis clinical features in Taiwanese**

Chin-Man Wang<sup>1</sup>, Shu-Chun Tsai<sup>2</sup>, Jing-Chi Lin<sup>3</sup>, Yeong-Jian Jan Wu<sup>3</sup>, Jianming Wu<sup>4</sup>, Ji-Yih Chen<sup>3</sup>

Supplemental Table 1 Association of the *RANKL/RANK/OPG* SNPs with age of disease onset in the AS patients

| SNP                    | Risk Allele   |              | Genotype Frequency (%) |              | $P_{Trend}^*$ | $P_{FDR}$ | Test for mode of inheritance unadjusted |           |             | Test for mode of inheritance adjusted for sex |             |             |        |                  |
|------------------------|---------------|--------------|------------------------|--------------|---------------|-----------|-----------------------------------------|-----------|-------------|-----------------------------------------------|-------------|-------------|--------|------------------|
|                        | Frequency     |              |                        |              |               |           | P                                       | $P_{FDR}$ | OR (95% CI) | P                                             | $P_{FDR}$   | OR (95% CI) |        |                  |
| <b>RANKL rs1805034</b> |               |              |                        |              |               |           |                                         |           |             |                                               |             |             |        |                  |
| <b>CT</b>              | <b>C</b>      | <b>CC</b>    | <b>CT</b>              | <b>TT</b>    |               |           | Additive                                | 0.4471    | 0.5365      | 1.08 (0.89-1.32)                              | Additive    | 0.4673      | 0.6131 | 1.08 (0.88-1.31) |
| age group $\leq$ 16    | 205 (34.51%)  | 29 (9.76%)   | 147 (49.49%)           | 121 (40.74%) | 0.478         | 0.5736    | CC+CT vs TT                             | 0.1516    | 0.4299      | 1.22 (0.93-1.59)                              | CC+CT vs TT | 0.1500      | 0.4389 | 1.22 (0.93-1.6)  |
| age group $>$ 16       | 540 (32.81%)  | 92 (11.18%)  | 356 (43.26%)           | 375 (45.57%) |               |           | CC vs CT+TT                             | 0.5012    | 0.6835      | 0.86 (0.55-1.33)                              | CC vs CT+TT | 0.4546      | 0.5625 | 0.84 (0.54-1.31) |
|                        | <b>C</b>      | <b>CC</b>    | <b>CT</b>              | <b>TT</b>    |               |           | Additive                                | 0.0900    | 0.5402      | 1.18 (0.98-1.42)                              | Additive    | 0.0880      | 0.5282 | 1.19 (0.98-1.44) |
| age group $\leq$ 16    | 205 (34.51%)  | 29 (9.76%)   | 147 (49.49%)           | 121 (40.74%) | 0.0965        | 0.579     | CC+CT vs TT                             | 0.0216    | 0.1298      | 1.35 (1.05-1.73)                              | CC+CT vs TT | 0.0290      | 0.1742 | 1.34 (1.03-1.74) |
| Normal                 | 881 (30.96%)  | 142 (9.98%)  | 597 (41.95%)           | 684 (48.07%) |               |           | CC vs CT+TT                             | 0.9110    | 0.9391      | 0.98 (0.64-1.48)                              | CC vs CT+TT | 0.9358      | 0.9745 | 1.02 (0.66-1.57) |
| <b>RANKL rs7984870</b> |               |              |                        |              |               |           |                                         |           |             |                                               |             |             |        |                  |
| <b>CG</b>              | <b>C</b>      | <b>CC</b>    | <b>CG</b>              | <b>GG</b>    | 0.1811        | 0.5433    | Additive                                | 0.1662    | 0.4987      | 1.14 (0.95-1.38)                              | Additive    | 0.1717      | 0.5150 | 1.14 (0.95-1.38) |
| age group $\leq$ 16    | 287 (48.48%)  | 71 (23.99%)  | 145 (48.99%)           | 80 (27.03%)  |               |           | CC+CG vs GG                             | 0.3904    | 0.4299      | 1.14 (0.85-1.53)                              | CC+CG vs GG | 0.3782      | 0.4389 | 1.14 (0.85-1.54) |
| age group $>$ 16       | 740 (45.18%)  | 164 (20.02%) | 412 (50.31%)           | 243 (29.67%) |               |           | CC vs CG+GG                             | 0.1525    | 0.4576      | 1.26 (0.92-1.73)                              | CC vs CG+GG | 0.1687      | 0.5061 | 1.25 (0.91-1.72) |
|                        | <b>G</b>      | <b>CC</b>    | <b>CG</b>              | <b>GG</b>    |               |           | Additive                                | 0.8364    | 0.9411      | 1.02 (0.85-1.21)                              | Additive    | 0.8342      | 0.9687 | 1.02 (0.85-1.22) |
| age group $\leq$ 16    | 305 (51.52%)  | 71 (23.99%)  | 145 (48.99%)           | 80 (27.03%)  | 0.8553        | 0.9662    | GG+CG vs CC                             | 0.9601    | 0.9601      | 1.01 (0.75-1.35)                              | GG+CG vs CC | 0.7817      | 0.9380 | 1.04 (0.77-1.41) |
| Normal                 | 1456 (51.05%) | 344 (24.12%) | 708 (49.65%)           | 374 (26.23%) |               |           | GG vs CG+CC                             | 0.7749    | 0.9391      | 1.04 (0.79-1.38)                              | GG vs CG+CC | 0.9448      | 0.9745 | 1.01 (0.76-1.35) |
| <b>RANKL rs9525641</b> |               |              |                        |              |               |           |                                         |           |             |                                               |             |             |        |                  |
| <b>CT</b>              | <b>C</b>      | <b>CC</b>    | <b>CT</b>              | <b>TT</b>    | 0.0996        | 0.5433    | Additive                                | 0.0983    | 0.4987      | 1.17 (0.97-1.41)                              | Additive    | 0.0914      | 0.5150 | 1.18 (0.97-1.42) |
| age group $\leq$ 16    | 289 (48.82%)  | 73 (24.66%)  | 143 (48.31%)           | 80 (27.03%)  |               |           | CC+CT vs TT                             | 0.3182    | 0.4299      | 1.16 (0.87-1.56)                              | CC+CT vs TT | 0.2862      | 0.4389 | 1.18 (0.87-1.58) |
| age group $>$ 16       | 733 (44.86%)  | 162 (19.83%) | 409 (50.06%)           | 246 (30.11%) |               |           | CC vs CT+TT                             | 0.0814    | 0.4576      | 1.32 (0.97-1.81)                              | CC vs CT+TT | 0.0839      | 0.5034 | 1.32 (0.96-1.81) |
|                        | <b>T</b>      | <b>CC</b>    | <b>CT</b>              | <b>TT</b>    |               |           | Additive                                | 0.9411    | 0.9411      | 1.01 (0.85-1.2)                               | Additive    | 0.9687      | 0.9687 | 1 (0.84-1.2)     |
| age group $\leq$ 16    | 303 (51.18%)  | 73 (24.66%)  | 143 (48.31%)           | 80 (27.03%)  | 0.9662        | 0.9662    | TT+CT vs CC                             | 0.8691    | 0.9601      | 0.98 (0.73-1.3)                               | TT+CT vs CC | 0.9741      | 0.9741 | 1.01 (0.74-1.36) |
| Normal                 | 1458 (51.01%) | 346 (24.21%) | 708 (49.55%)           | 375 (26.24%) |               |           | TT vs CT+CC                             | 0.7790    | 0.9391      | 1.04 (0.79-1.38)                              | TT vs CT+CC | 0.9745      | 0.9745 | 1 (0.75-1.34)    |

**RANKL rs9533155**

| <b>GC</b>      | <b>G</b>      | <b>GG</b>    | <b>GC</b>    | <b>CC</b>    | 0.2868 |        |             |        |        |                  |             |        |        |                  |
|----------------|---------------|--------------|--------------|--------------|--------|--------|-------------|--------|--------|------------------|-------------|--------|--------|------------------|
|                |               |              |              |              |        | 0.5736 | Additive    | 0.2690 | 0.5365 | 1.11 (0.92-1.34) | Additive    | 0.2753 | 0.5505 | 1.11 (0.92-1.34) |
| age group ≤ 16 | 274 (46.28%)  | 64 (21.62%)  | 146 (49.32%) | 86 (29.05%)  |        |        | GG+GC vs CC | 0.4125 | 0.4299 | 1.13 (0.85-1.51) | GG+GC vs CC | 0.3837 | 0.4389 | 1.14 (0.85-1.52) |
| age group > 16 | 715 (43.65%)  | 155 (18.93%) | 405 (49.45%) | 259 (31.62%) |        |        | GG vs GC+CC | 0.3173 | 0.6347 | 1.18 (0.85-1.64) | GG vs GC+CC | 0.3594 | 0.5625 | 1.17 (0.84-1.62) |
|                | <b>C</b>      | <b>GG</b>    | <b>GC</b>    | <b>CC</b>    |        |        | Additive    | 0.6973 | 0.9411 | 1.04 (0.87-1.24) | Additive    | 0.7039 | 0.9687 | 1.04 (0.86-1.24) |
| age group ≤ 16 | 318 (53.72%)  | 64 (21.62%)  | 146 (49.32%) | 86 (29.05%)  | 0.714  | 0.9662 | CC+GC vs GG | 0.8041 | 0.9601 | 1.04 (0.77-1.41) | CC+GC vs GG | 0.6008 | 0.9013 | 1.09 (0.8-1.49)  |
| Normal         | 1508 (52.84%) | 318 (22.28%) | 710 (49.75%) | 399 (27.96%) |        |        | CC vs GC+GG | 0.7035 | 0.9391 | 1.06 (0.8-1.39)  | CC vs GC+GG | 0.9077 | 0.9745 | 1.02 (0.77-1.35) |

**OPG rs3102735 CT**

| <b>T</b>       | <b>CC</b>     | <b>CT</b>  | <b>TT</b>    | 0.7876        | 0.7876 |        |             |        |        |                  |             |        |        |                  |
|----------------|---------------|------------|--------------|---------------|--------|--------|-------------|--------|--------|------------------|-------------|--------|--------|------------------|
|                |               |            |              |               |        |        | Additive    | 0.7379 | 0.7379 | 1.05 (0.8-1.37)  | Additive    | 0.8411 | 0.8411 | 1.03 (0.78-1.35) |
| age group ≤ 16 | 509 (85.69%)  | 4 (1.35%)  | 77 (25.93%)  | 216 (72.73%)  |        |        | TT+CT vs CC | 0.4299 | 0.4299 | 1.56 (0.52-4.63) | TT+CT vs CC | 0.4389 | 0.4389 | 1.55 (0.52-4.62) |
| age group > 16 | 1391 (85.13%) | 17 (2.08%) | 209 (25.58%) | 591 (72.34%)  |        |        | TT vs CT+CC | 0.8979 | 0.8979 | 1.02 (0.76-1.37) | TT vs CT+CC | 0.9879 | 0.9879 | 1 (0.74-1.34)    |
|                | <b>C</b>      | <b>CC</b>  | <b>CT</b>    | <b>TT</b>     |        |        | Additive    | 0.8759 | 0.9411 | 1.02 (0.79-1.31) | Additive    | 0.7195 | 0.9687 | 1.05 (0.81-1.36) |
| age group ≤ 16 | 85 (14.31%)   | 4 (1.35%)  | 77 (25.93%)  | 216 (72.73%)  | 0.8955 | 0.9662 | CC+CT vs TT | 0.6190 | 0.9601 | 1.07 (0.81-1.42) | CC+CT vs TT | 0.4786 | 0.9013 | 1.11 (0.83-1.49) |
| Normal         | 400 (14.06%)  | 32 (2.25%) | 336 (23.63%) | 1054 (74.12%) |        |        | CC vs CT+TT | 0.3280 | 0.9391 | 0.59 (0.21-1.68) | CC vs CT+TT | 0.3492 | 0.9745 | 0.6 (0.21-1.74)  |

**OPG rs2073618**

| <b>G</b>       | <b>CC</b>                                                                                                                                                                                                                                     | <b>CG</b>    | <b>GG</b>    | 0.4029     |        |        |             |        |        |                  |             |        |        |                  |
|----------------|-----------------------------------------------------------------------------------------------------------------------------------------------------------------------------------------------------------------------------------------------|--------------|--------------|------------|--------|--------|-------------|--------|--------|------------------|-------------|--------|--------|------------------|
|                |                                                                                                                                                                                                                                               |              |              |            | 0.5736 |        | Additive    | 0.4031 | 0.5365 | 1.1 (0.88-1.36)  | Additive    | 0.5109 | 0.6131 | 1.08 (0.87-1.33) |
| age group ≤ 16 | 146 (24.75%)                                                                                                                                                                                                                                  | 165 (55.93%) | 114 (38.64%) | 16 (5.42%) |        |        | GG+CG vs CC | 0.1892 | 0.4299 | 1.2 (0.92-1.57)  | GG+CG vs CC | 0.2405 | 0.4389 | 1.18 (0.9-1.54)  |
| age group > 16 | 377 (23.02%)                                                                                                                                                                                                                                  | 494 (60.32%) | 273 (33.33%) | 52 (6.35%) |        |        | GG vs CG+CC | 0.5696 | 0.6835 | 0.85 (0.48-1.5)  | GG vs CG+CC | 0.4687 | 0.5625 | 0.81 (0.45-1.44) |
|                | <b>G</b> <th><b>CC</b></th> <th><b>CG</b></th> <th><b>GG</b></th> <td></td> <td></td> <td>Additive</td> <td>0.6505</td> <td>0.9411</td> <td>1.05 (0.85-1.29)</td> <td>Additive</td> <td>0.4477</td> <td>0.9687</td> <td>1.09 (0.88-1.35)</td> | <b>CC</b>    | <b>CG</b>    | <b>GG</b>  |        |        | Additive    | 0.6505 | 0.9411 | 1.05 (0.85-1.29) | Additive    | 0.4477 | 0.9687 | 1.09 (0.88-1.35) |
| age group ≤ 16 | 146 (24.75%)                                                                                                                                                                                                                                  | 165 (55.93%) | 114 (38.64%) | 16 (5.42%) | 0.6743 | 0.9662 | GG+CG vs CC | 0.6085 | 0.9601 | 1.07 (0.83-1.37) | GG+CG vs CC | 0.4867 | 0.9013 | 1.1 (0.85-1.42)  |
| Normal         | 683 (23.88%)                                                                                                                                                                                                                                  | 823 (57.55%) | 531 (37.13%) | 76 (5.31%) |        |        | GG vs CG+CC | 0.9391 | 0.9391 | 1.02 (0.59-1.77) | GG vs CG+CC | 0.6306 | 0.9745 | 1.15 (0.65-2.05) |

\*PTrend: the p-value from Cochran–Armitage trend test with 100,000 permutations.

Supplemental Table 2 Haplotype association of the *RANKL* SNPs rs7984870, rs9533155 and rs9525641 with syndesmophyte formation in AS cases

| Haplotype of<br>rs7984870,rs9533155 and<br>rs9525641 | Estimated Frequency (%)   |                           |                      | Permutation | Logistic regression |                  | Logistic regression adjusted for sex |                  |
|------------------------------------------------------|---------------------------|---------------------------|----------------------|-------------|---------------------|------------------|--------------------------------------|------------------|
|                                                      | Syndesmophyte+<br>(N=485) | Syndesmophyte-<br>(N=635) | AS cases<br>(N=1120) | P value*    | P value             | OR (95% CI)      | P value                              | OR (95% CI)      |
| G-C-T                                                | 53.34%                    | 49.94%                    | 51.41%               | 0.1135      | 0.1103              | 1.15 (0.97-1.36) | 0.0990                               | 1.16 (0.97-1.37) |
| C-G-C                                                | 39.71%                    | 43.45%                    | 41.83%               | 0.0713      | 0.0760              | 0.86 (0.72-1.02) | <b>0.0724</b>                        | 0.85 (0.72-1.01) |
| Others                                               | 6.95%                     | 6.60%                     | 6.76%                |             | 0.7549              | 1.05 (0.75-1.48) | 0.8037                               | 1.04 (0.74-1.47) |

Note\*: The p-value for the estimated haplotype was generated from 10,000 permutations using the EM algorithm.

Supplemental Table 3 Haplotype association of the *RANKL* SNPs rs7984870, rs9533155 and rs9525641 with HLA-B27 in AS cases

| Haplotype of<br>rs7984870,rs9533155 and<br>rs9525641 | Estimated Frequency (%)  |                        |                      | Permutation | Logistic regression |                  | Logistic regression adjusted for sex |                  |
|------------------------------------------------------|--------------------------|------------------------|----------------------|-------------|---------------------|------------------|--------------------------------------|------------------|
|                                                      | B27 positive<br>(N=1021) | B27 negative<br>(N=99) | AS cases<br>(N=1120) | P value*    | P value             | OR (95% CI)      | P value                              | OR (95% CI)      |
| G-C-T                                                | 51.70%                   | 48.43%                 | 51.41%               | 0.3959      | 0.3775              | 1.14 (0.85-1.53) | 0.3717                               | 1.14 (0.85-1.53) |
| C-G-C                                                | 41.48%                   | 45.40%                 | 41.83%               | 0.2788      | 0.2874              | 0.85 (0.64-1.14) | 0.2900                               | 0.85 (0.63-1.15) |
| Others                                               | 6.82%                    | 6.16%                  | 6.76%                |             | 0.7356              | 1.11 (0.6-2.04)  | 0.7599                               | 1.1 (0.6-2.03)   |

Note\*: The p-value for the estimated haplotype was generated from 10,000 permutations using the EM algorithm.

Supplemental Table 4 Haplotype association of the *RANKL* SNPs rs7984870, rs9533155 and rs9525641 with age of disease onset in AS cases

| Haplotype of<br>rs7984870,rs9533155 and<br>rs9525641 | Estimated Frequency (%)        |                             |                      | Permutation | Logistic regression |                  | Logistic regression adjusted for sex |                  |
|------------------------------------------------------|--------------------------------|-----------------------------|----------------------|-------------|---------------------|------------------|--------------------------------------|------------------|
|                                                      | age group $\leq 16$<br>(N=297) | age group $> 16$<br>(N=823) | AS cases<br>(N=1120) | P value*    | P value             | OR (95% CI)      | P value                              | OR (95% CI)      |
| G-C-T                                                | 49.63%                         | 52.06%                      | 51.41%               | 0.3206      | 0.3015              | 0.91 (0.75-1.09) | 0.3011                               | 0.91 (0.75-1.09) |
| C-G-C                                                | 44.91%                         | 40.71%                      | 41.83%               | 0.0718      | 0.0779              | 1.19 (0.98-1.43) | <b>0.0748</b>                        | 1.19 (0.98-1.44) |
| Others                                               | 5.47%                          | 7.23%                       | 6.76%                |             | 0.1564              | 0.75 (0.5-1.12)  | 0.1468                               | 0.74 (0.49-1.11) |

Note\*: The p-value for the estimated haplotype was generated from 10,000 permutations using the EM algorithm.

Supplemental Table 5 Haplotype association of the *OPG* SNPs rs2073618 and rs3102735 in the AS cases and healthy controls

| Haplotype of rs2073618<br>and rs3102735 | Estimated Frequency (%) |                    |                 | Permutation | Logistic regression |                  | Logistic regression adjusted for sex |                  |
|-----------------------------------------|-------------------------|--------------------|-----------------|-------------|---------------------|------------------|--------------------------------------|------------------|
|                                         | AS<br>(N=1120)          | Normal<br>(N=1435) | All<br>(N=2555) | P value*    | P value             | OR (95% CI)      | P value                              | OR (95% CI)      |
| C-T                                     | 62.37%                  | 62.87%             | 62.63%          | 0.7237      | 0.7969              | 0.99 (0.88-1.1)  | 0.5323                               | 0.96 (0.85-1.08) |
| G-T                                     | 22.90%                  | 23.08%             | 23.02%          | 0.8861      | 0.7485              | 0.98 (0.86-1.12) | 0.7935                               | 0.98 (0.86-1.13) |
| C-C                                     | 14.15%                  | 13.27%             | 13.67%          | 0.3710      | 0.4397              | 1.06 (0.91-1.25) | 0.2256                               | 1.11 (0.94-1.31) |
| G-C                                     | 0.58%                   | 0.79%              | 0.68%           | 0.5721      | 0.8829              | 0.92 (0.29-2.89) | 0.8923                               | 0.92 (0.28-3.05) |

Note\*: The p-value for the estimated haplotype was generated from 10,000 permutations using the EM algorithm.

Supplemental Table 6 Haplotype association of the *OPG* SNPs rs2073618 and rs3102735 with syndesmophyte formation in the AS cases

| Haplotype of rs2073618<br>and rs3102735 | Estimated Frequency (%)   |                           |                      | Permutation | Logistic regression |                   | Logistic regression adjusted for sex |                   |
|-----------------------------------------|---------------------------|---------------------------|----------------------|-------------|---------------------|-------------------|--------------------------------------|-------------------|
|                                         | Syndesmophyte+<br>(N=485) | Syndesmophyte-<br>(N=635) | AS cases<br>(N=1120) | P value*    | P value             | OR (95% CI)       | P value                              | OR (95% CI)       |
| C-T                                     | 63.47%                    | 61.45%                    | 62.37%               | 0.3411      | 0.4510              | 1.07 (0.9-1.27)   | 0.3719                               | 1.08 (0.91-1.29)  |
| G-T                                     | 22.00%                    | 23.67%                    | 22.90%               | 0.3649      | 0.5151              | 0.94 (0.77-1.14)  | 0.2854                               | 0.89 (0.73-1.1)   |
| C-C                                     | 13.60%                    | 14.65%                    | 14.15%               | 0.4985      | 0.6320              | 0.94 (0.74-1.2)   | 0.8861                               | 0.98 (0.77-1.26)  |
| G-C                                     | 0.93%                     | 0.24%                     | 0.58%                | 0.1633      | 0.1384              | 5.25 (0.59-47.04) | 0.1943                               | 4.27 (0.48-38.31) |

Note\*: The p-value for the estimated haplotype was generated from 10,000 permutations using the EM algorithm.



Supplemental Table 7 Haplotype association of the *OPG* SNPs rs2073618 and rs3102735 with age of disease onset in the AS cases

| Haplotype of rs2073618<br>and rs3102735 | Estimated Frequency (%)        |                             |                      | Permutation | Logistic regression |                   | Logistic regression adjusted for sex |                   |
|-----------------------------------------|--------------------------------|-----------------------------|----------------------|-------------|---------------------|-------------------|--------------------------------------|-------------------|
|                                         | age group $\leq 16$<br>(N=297) | age group $> 16$<br>(N=823) | AS cases<br>(N=1120) | P value*    | P value             | OR (95% CI)       | P value                              | OR (95% CI)       |
| C-T                                     | 62.24%                         | 62.51%                      | 62.37%               | 0.8961      | 0.6882              | 0.96 (0.79-1.17)  | 0.7245                               | 0.97 (0.8-1.17)   |
| G-T                                     | 23.45%                         | 22.61%                      | 22.90%               | 0.6885      | 0.4770              | 1.08 (0.87-1.35)  | 0.5860                               | 1.06 (0.85-1.33)  |
| C-C                                     | 12.99%                         | 14.48%                      | 14.15%               | 0.3736      | 0.6947              | 0.95 (0.72-1.24)  | 0.8040                               | 0.97 (0.74-1.27)  |
| G-C                                     | 1.32%                          | 0.41%                       | 0.58%                | 0.0636      | 0.5030              | 1.84 (0.31-11.06) | 0.5741                               | 1.67 (0.28-10.03) |

Note\*: The p-value for the estimated haplotype was generated from 10,000 permutations using the EM algorithm.

Supplemental Table 8 Haplotype association of the *OPG* SNPs rs2073618 and rs3102735 with HLA-B27 in the AS cases

| Haplotype of rs2073618<br>and rs3102735 | Estimated Frequency (%)  |                        |                      | Permutation | Logistic regression |                  | Logistic regression adjusted for sex |                  |
|-----------------------------------------|--------------------------|------------------------|----------------------|-------------|---------------------|------------------|--------------------------------------|------------------|
|                                         | B27 positive<br>(N=1021) | B27 negative<br>(N=99) | AS cases<br>(N=1120) | P value*    | P value             | OR (95% CI)      | P value                              | OR (95% CI)      |
| C-T                                     | 62.68%                   | 59.01%                 | 62.37%               | 0.3228      | 0.2965              | 1.17 (0.87-1.58) | 0.2679                               | 1.18 (0.88-1.6)  |
| G-T                                     | 22.40%                   | 28.24%                 | 22.90%               | 0.0763      | 0.0621              | 0.73 (0.53-1.02) | <b>0.0373</b>                        | 0.7 (0.51-0.98)  |
| C-C                                     | 14.38%                   | 11.91%                 | 14.15%               | 0.3554      | 0.3572              | 1.23 (0.79-1.92) | 0.2784                               | 1.28 (0.82-2)    |
| G-C                                     | 0.54%                    | 0.84%                  | 0.58%                | 0.9340      | 0.3920              | 0.38 (0.04-3.44) | 0.3037                               | 0.32 (0.04-2.84) |

Note\*: The p-value for the estimated haplotype was generated from 10,000 permutations using the EM algorithm.

Supplemental Figure 1: The promoter activity by transient transfection of hFOB 1.19 cells with plasmid constructs that contained different *RANKL* promoters and a luciferase reporter. All the three reporter constructs (CTT, CTC, GCC) demonstrated much lower luciferase activities than the control vector, pGL

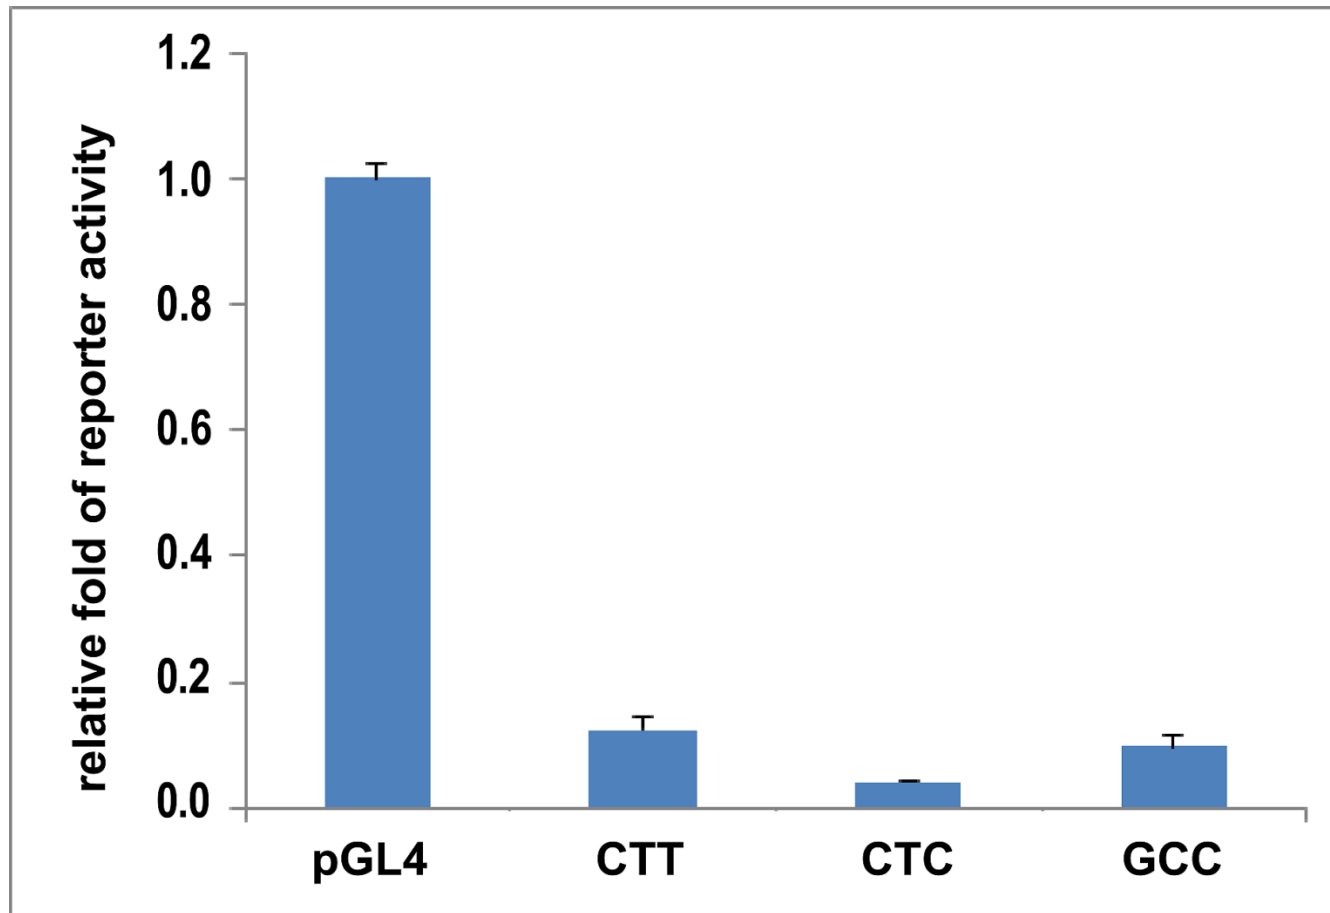

Supplement: f1 [file 8029863.f1.pdf]
